# Supplementary material
Source: PubMed Central journal article supplement (PMC2662165)

## Supplemental data

**Fig. S1. Densitometric analyses of Western blots in Fig 3.** The signal intensity of the bands was quantified by densitometry, and is shown as a percentage of the corresponding controls (the leftmost bar in each graph). Values are expressed as the mean  $\pm$  SEM. When a significant interaction was detected by ANOVA (All groups of Fig. 3A and 3B, and ZA-ECF of Fig. 3C), the data were analyzed by a *post-hoc* Fisher PLSD test.

**Fig. S1A (for Fig. 3A)**

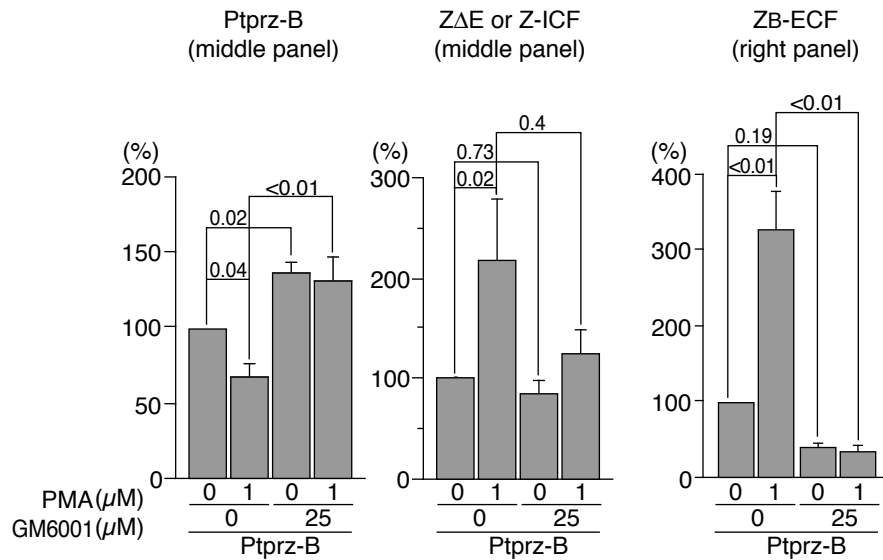

**Fig. S1B (for Fig. 3B)**

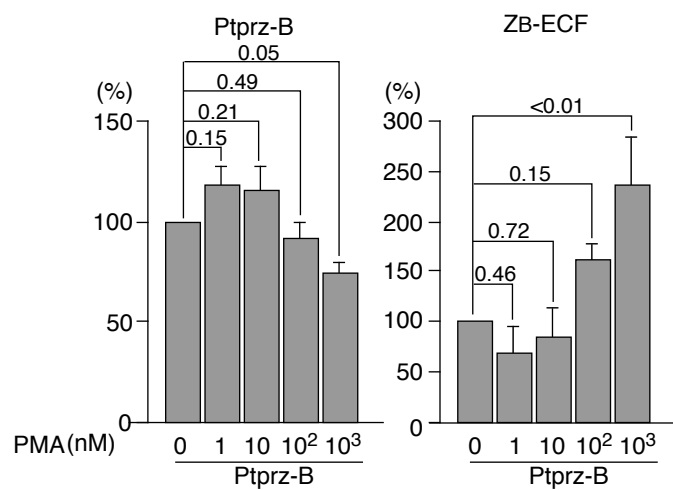

**Fig. S1C (for Fig. 3C)**

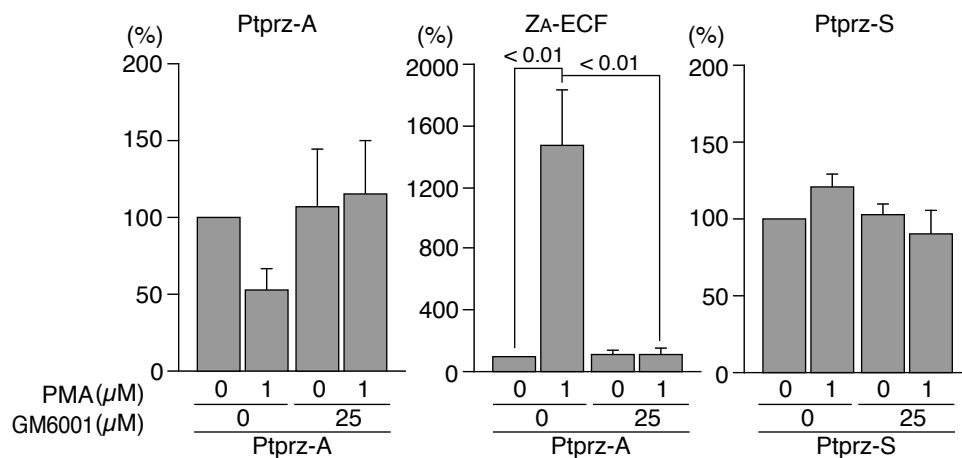

## Supplemental data

**Fig. S2. Densitometric analyses of Western blots in Fig 4.** The signal intensity of the bands was quantified by densitometry, and is shown as a percentage of the corresponding controls (the leftmost bar in each graph). Values are expressed as the mean  $\pm$  SEM. When a significant interaction was detected by ANOVA (All groups), the data were analyzed by a *post-hoc* Fisher PLSD test.

**Fig. S2 (for Fig. 4)**

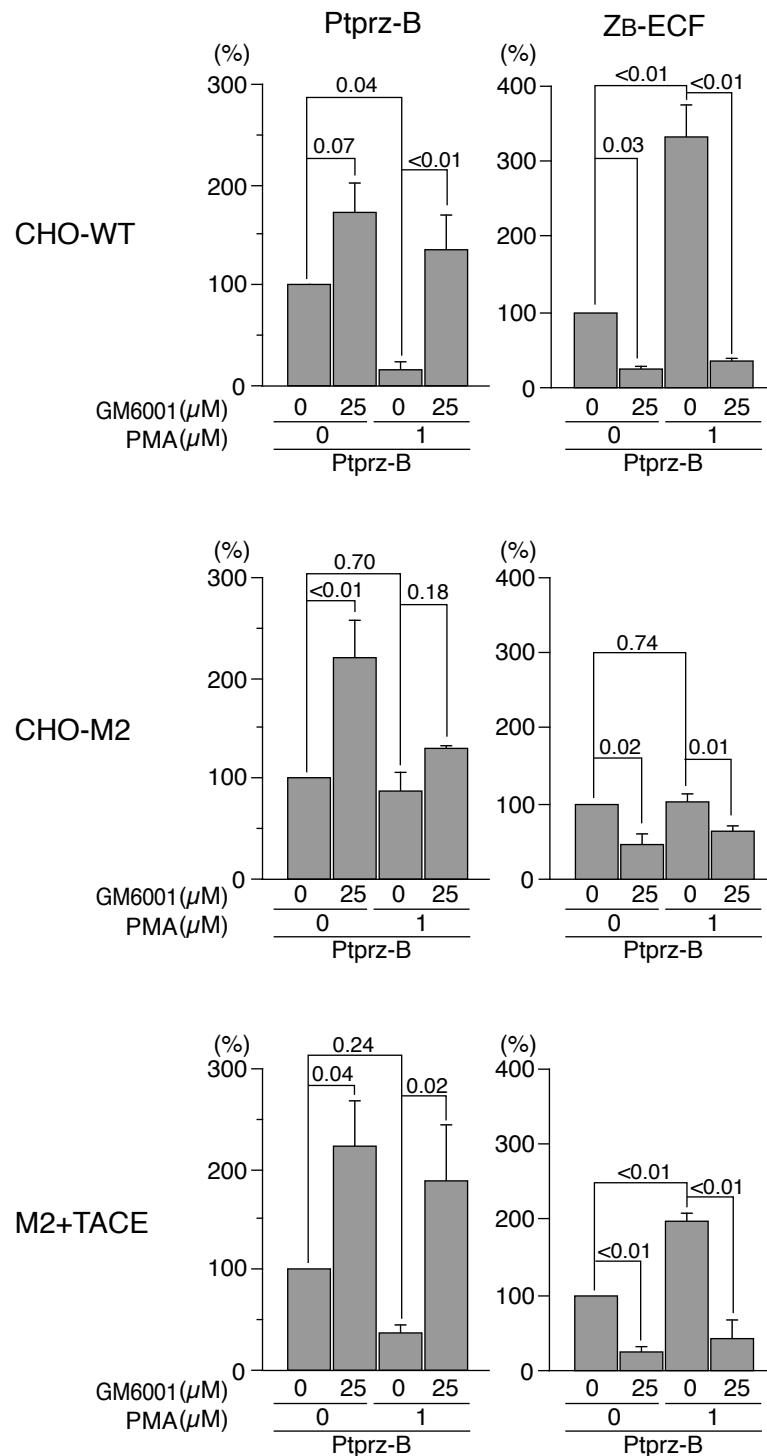

Supplemental data

**Fig. S3. Densitometric analyses of the Western blots in Fig 5.** The signal intensity of the bands was quantified by densitometry, and shown as a percentage of the corresponding controls (the leftmost bar in each graph). Values are expressed as the mean  $\pm$  SEM. When a significant interaction was detected by ANOVA (All groups of CHO-WT cells), the data were analyzed by a *post-hoc* Fisher PLSD test.

**Fig. S3 (for Fig. 5)**

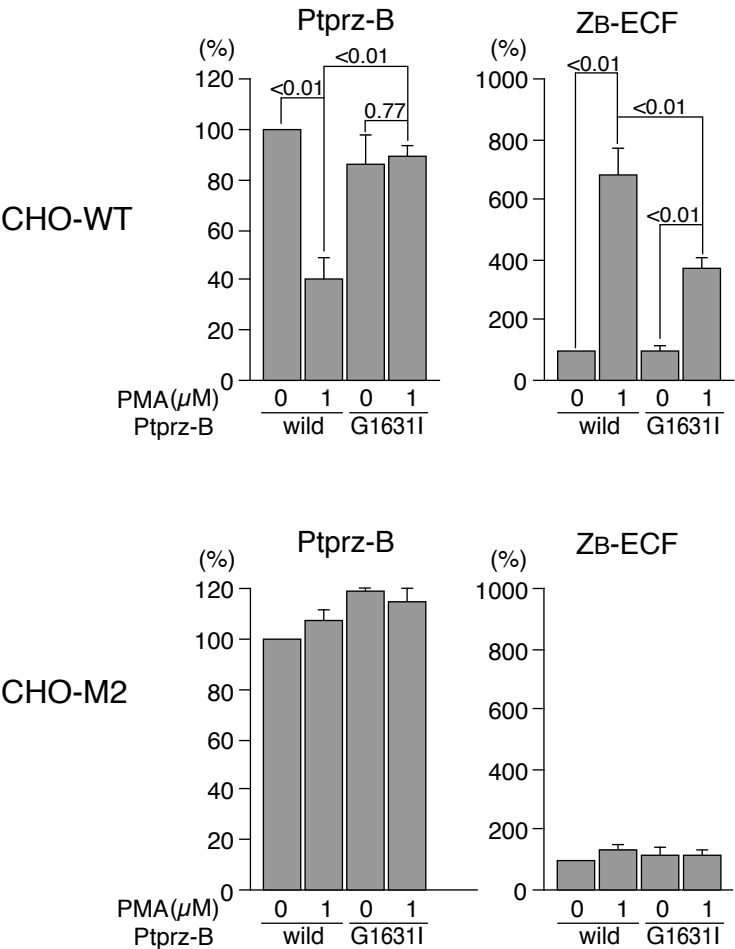

## Supplemental data

**Fig. S4. Densitometric analyses of Western blots in Fig 8.** The signal intensity of the bands was quantified by densitometry, and is shown as a percentage of the corresponding controls (the leftmost bar in each graph). Values are expressed as the mean  $\pm$  SEM. When a significant interaction was detected by ANOVA (All groups), the data were analyzed by a *post-hoc* Fisher PLSD test.

**Fig. S4 (for Fig. 8)**

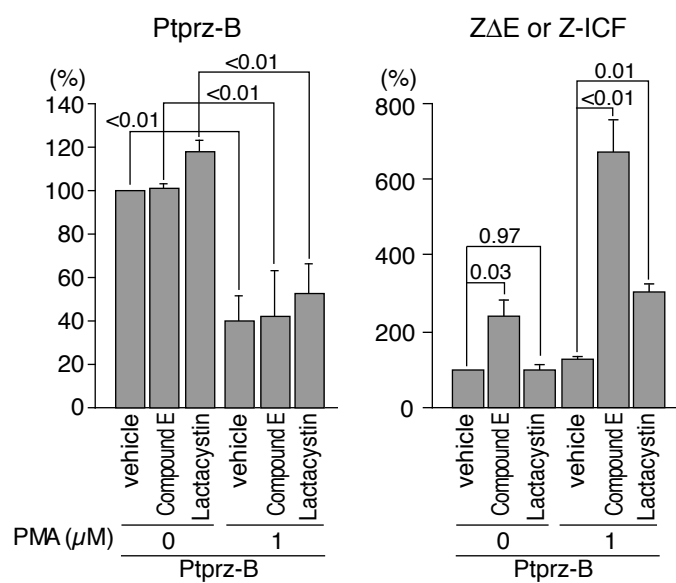

## Supplemental data

**Fig. S5. Densitometric analyses of Western blots in Fig 9.** The signal intensity of the bands was quantified by densitometry, and is shown as a percentage of the corresponding controls (the leftmost bar in each graph). Values are expressed as the mean  $\pm$  SEM. When a significant interaction was detected by ANOVA ("Z $\Delta$ E or Z-ICF" of PS1 WT cells and "Ptpz-B" and "Z $\Delta$ E or Z-ICF" of PS1 D385A cells), the data were analyzed by a *post-hoc* Fisher PLSD test.

**Fig. S5 (for Fig. 9)**

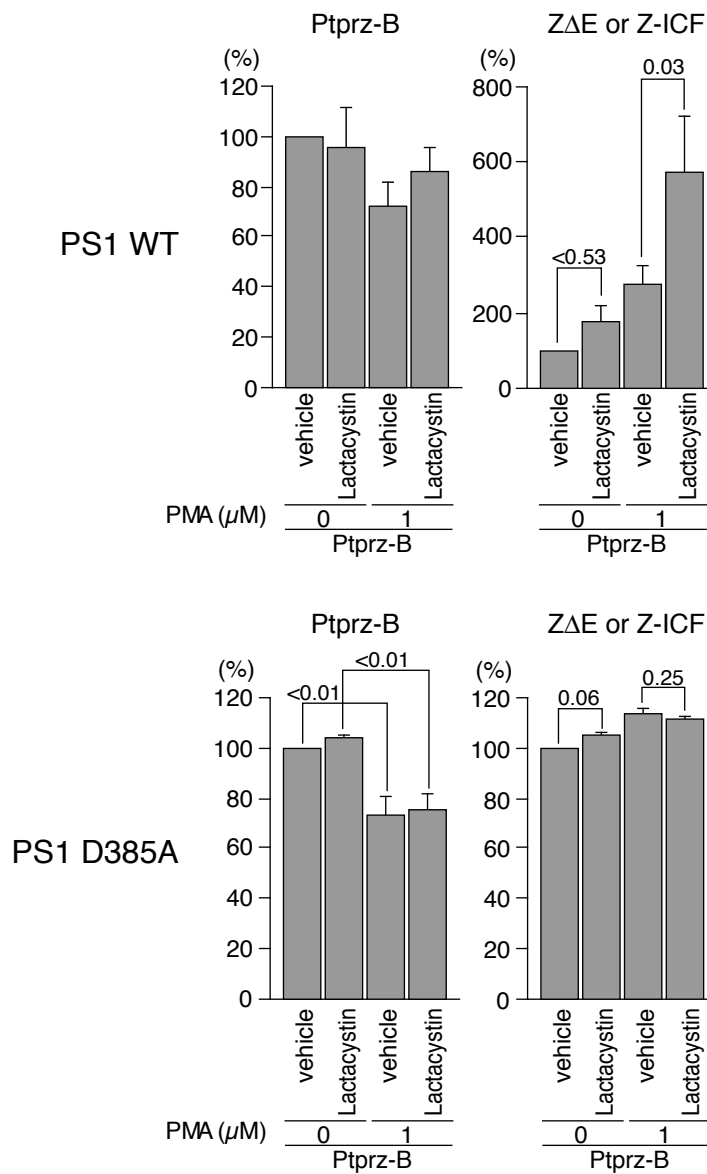

Supplement: M802976200_1.pdf [file M802976200_1.pdf]
